# Supplementary material for: A novel manganese dioxide-based drug delivery strategy via in situ coating γ-polyglutamic acid/cisplatin for intelligent anticancer therapy
Source: Royal Society of Chemistry journal article supplement (doi:10.1039/d2tb01659a), 2022-11-28
Supplement: d2tb01659a1.pdf [file d2tb01659a1.pdf]

## Supporting Information

### **A Novel Manganese Dioxide-Based Drug Delivery Strategy via In Situ Coating $\gamma$ -Polyglutamic Acid/Cisplatin for Intelligent Anticancer Therapy**

*Zheng Zhang,<sup>a</sup> Weichen Yan,<sup>a</sup> Yuanhui Ji<sup>a\*</sup>*

<sup>a</sup>Jiangsu Province Hi-Tech Key Laboratory for Biomedical Research, School of Chemistry and Chemical Engineering, Southeast University, Nanjing, 211189, China

**\*Correspondence: Prof. Dr. Yuanhui Ji**

No.2 Southeast University Road, Nanjing, Jiangsu 211189, China

E-mail: yuanhui.ji@seu.edu.cn; yuanhuijinj@163.com

## Supplementary Figures and Tables:

**Fig. S1.** TEM-energy dispersive X-ray spectroscopy (EDS) of the PGA/CDDP@MnO<sub>2</sub> NPs.

**Fig. S2.** FESEM-EDS of the PGA/CDDP@MnO<sub>2</sub> NPs.

**Fig. S3.** Wide-scan X-ray photoelectron spectroscopy (XPS) spectra (a), C1s (b), O1s (c), and Pt4f (d) spectra of PGA/CDDP@MnO<sub>2</sub> NPs.

**Fig. S4.** X-ray diffraction (XRD) of PGA/CDDP@MnO<sub>2</sub> NPs.

**Table S1.** Parameters  $k$ ,  $n$  and  $R^2$  determined by Eq. (1) for the CDDP release of PGA/CDDP@MnO<sub>2</sub> NPs at different release conditions.

**Fig. S5.** Plots of  $\ln(M_t/M_\infty)$  versus  $\ln t$  for the release profiles of PGA/CDDP@MnO<sub>2</sub> NPs under different GSH conditions.

**Fig. S6.** Plots of  $\ln(M_t/M_\infty)$  versus  $\ln t$  for the release profiles of PGA/CDDP@MnO<sub>2</sub> NPs under different PBS conditions.

**Fig. S7.** HR-TEM images of the PGA/CDDP@MnO<sub>2</sub> NPs after degradation (24 h) in GSH and PBS medium.

**Fig. S8.** High magnification image of PGA/CDDP@MnO<sub>2</sub> NPs after degradation in GSH medium (10 mM) for 24 h (a: scale bar = 50 nm, b: scale bar = 20 nm).

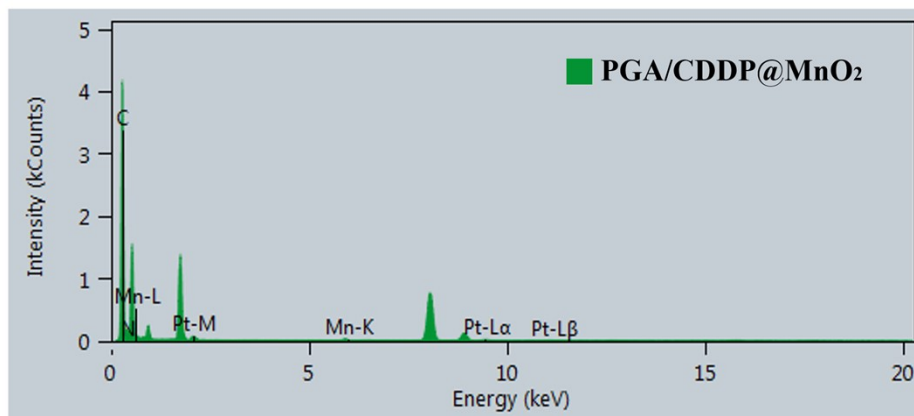

**Fig. S1.** TEM-energy dispersive X-ray spectroscopy (EDS) of PGA/CDDP@MnO<sub>2</sub> NPs.

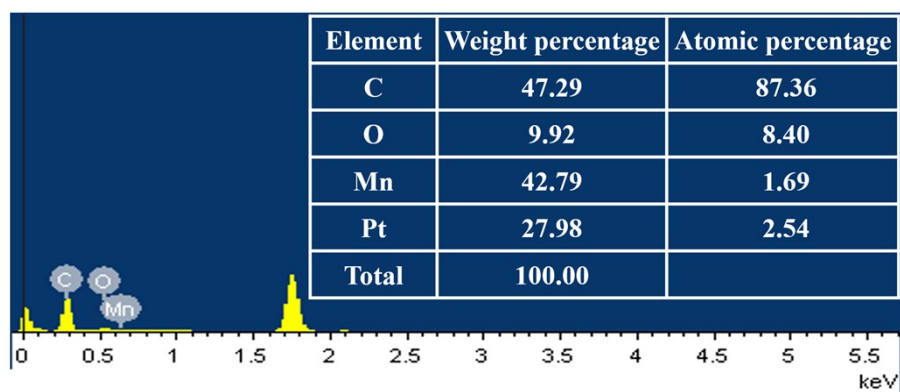

**Fig. S2.** FESEM-energy dispersive X-ray spectroscopy (EDS) of PGA/CDDP@MnO<sub>2</sub> NPs..

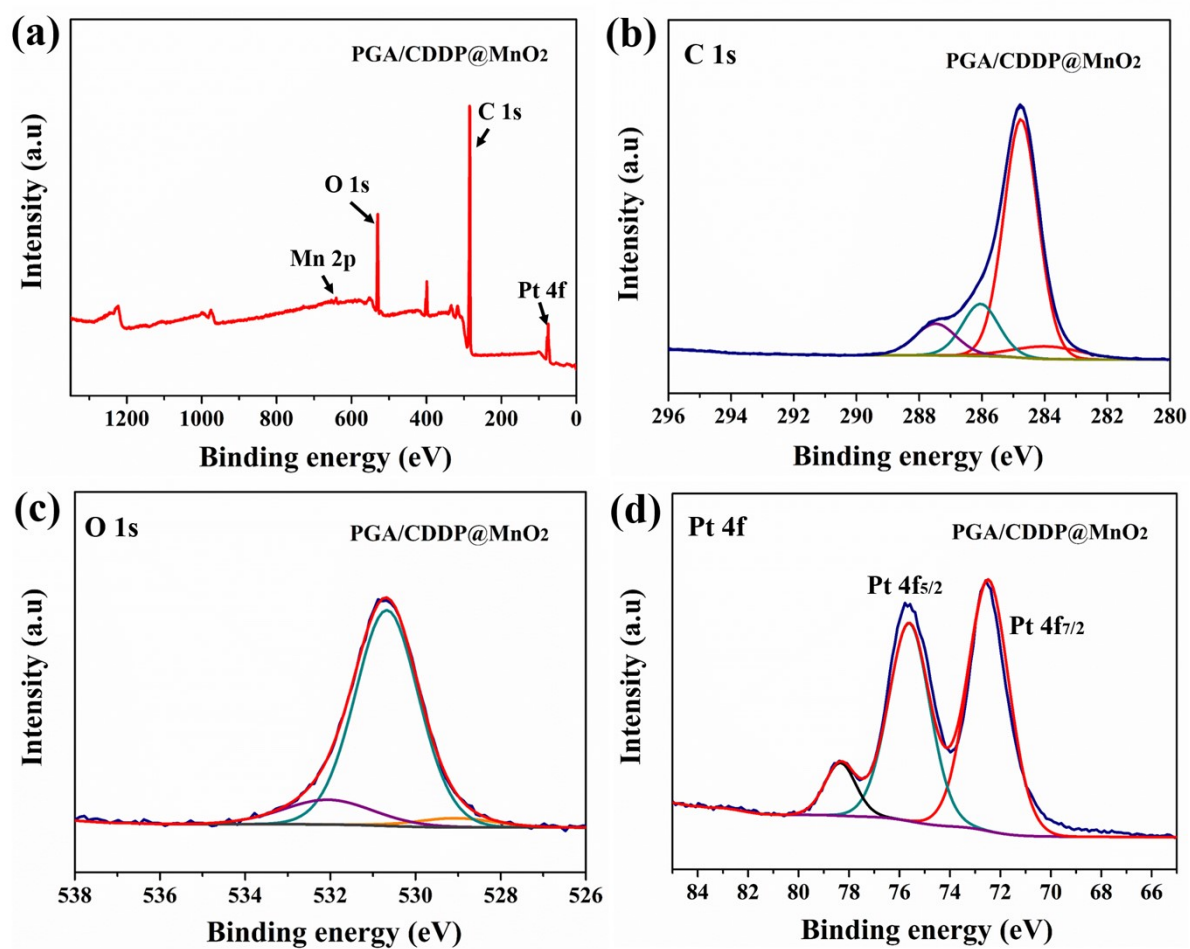

**Fig. S3.** The wide-scan X-ray photoelectron spectroscopy (XPS) spectra (a), C1s (b), O1s (c), and Pt4f (d) spectra of PGA/CDDP@MnO<sub>2</sub> NPs.

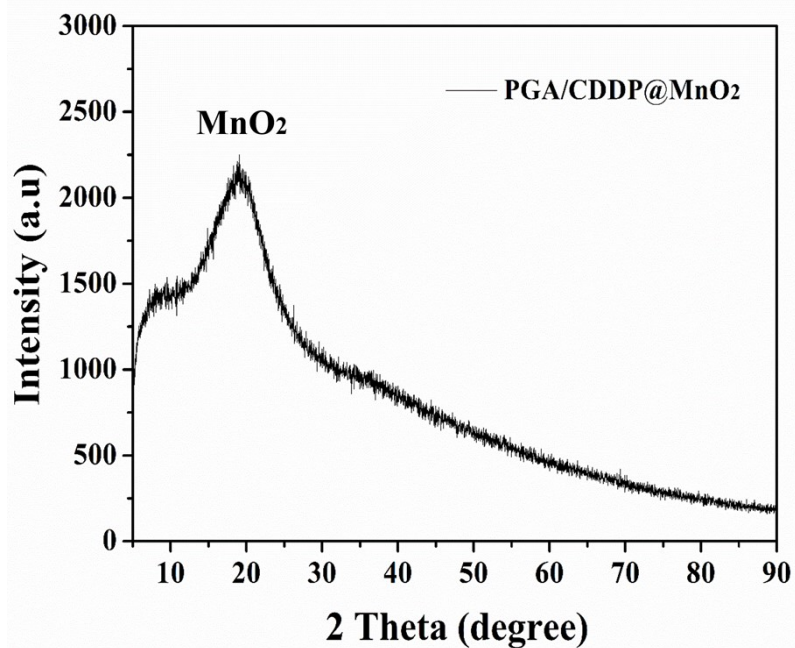

**Fig. S4.** X-ray diffraction (XRD) spectrum of PGA/CDDP@MnO<sub>2</sub> NPs.

**Table S1.** Parameters  $k$ ,  $n$  and  $R^2$  determined by Eq. (1) for the CDDP release from PGA/CDDP@MnO<sub>2</sub> NPs at different release conditions.

| Sample                        | Release condition | $k$                   | $n$    | $R^2$  |
|-------------------------------|-------------------|-----------------------|--------|--------|
| PGA/CDDP@MnO <sub>2</sub> NPs | GSH=2 mM          | $3.63 \times 10^{-7}$ | 0.9703 | 0.9134 |
| PGA/CDDP@MnO <sub>2</sub> NPs | GSH=5 mM          | $8.06 \times 10^{-7}$ | 1.0077 | 0.9653 |
| PGA/CDDP@MnO <sub>2</sub> NPs | GSH=10 mM         | $8.24 \times 10^{-7}$ | 0.9338 | 0.6811 |
| PGA/CDDP@MnO <sub>2</sub> NPs | pH 6.5            | $7.31 \times 10^{-5}$ | 0.5827 | 0.9908 |
| PGA/CDDP@MnO <sub>2</sub> NPs | pH 4.5            | $1.10 \times 10^{-8}$ | 1.5131 | 0.8020 |
| PGA/CDDP@MnO <sub>2</sub> NPs | pH 2.1            | $4.64 \times 10^{-6}$ | 0.1376 | 0.9428 |

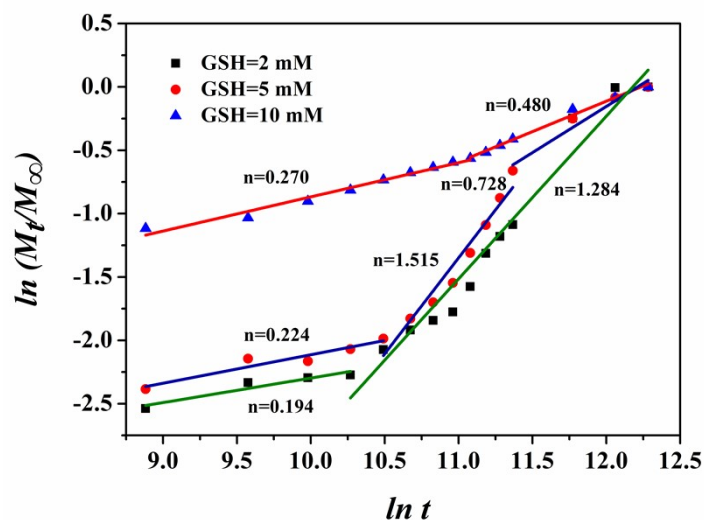

**Fig. S5.** Plots of  $\ln(M_t/M_\infty)$  versus  $\ln t$  for the release profiles of PGA/CDDP@MnO<sub>2</sub> NPs under different GSH conditions.

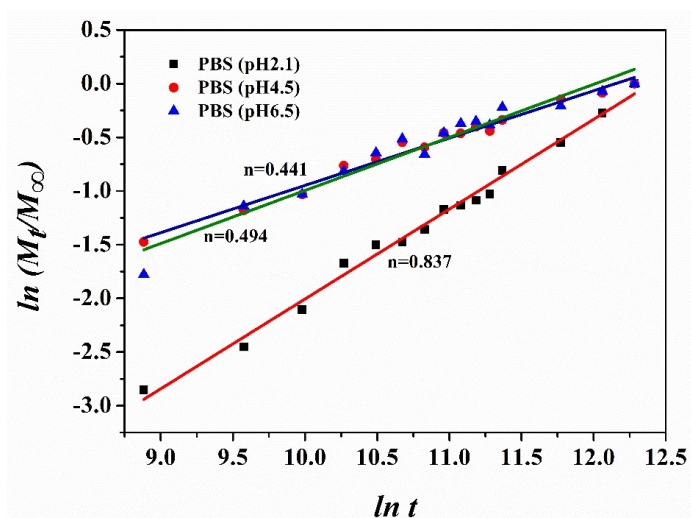

**Fig. S6.** Plots of  $\ln(M_t/M_\infty)$  versus  $\ln t$  for the release profiles of PGA/CDDP@MnO<sub>2</sub> NPs under different PBS conditions.

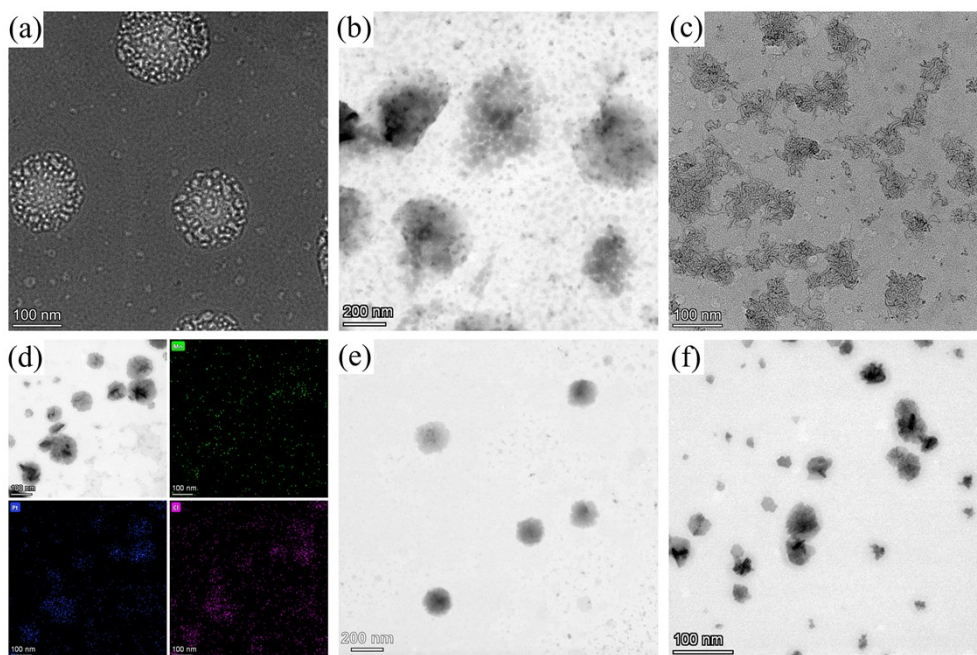

**Fig. S7.** HR-TEM images of the PGA/CDDP@MnO<sub>2</sub> NPs after degradation (24 h) in GSH medium with the concentration of 2 mM (a), 5 mM (b), and 10 mM (c). HR-TEM image and elemental mapping of PGA/CDDP@MnO<sub>2</sub> NPs after degradation in PBS medium with pH 6.5 (d), pH 4.5 (e), and pH 2.1 (f).

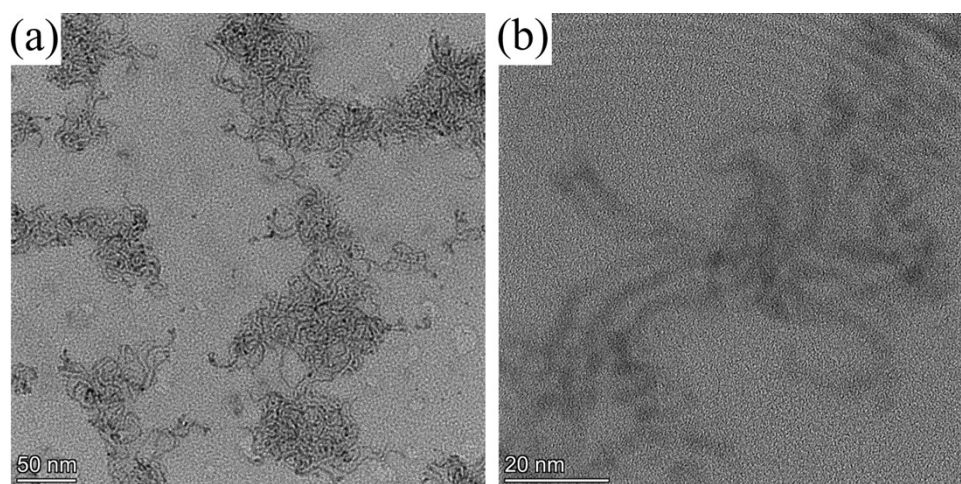

**Fig. S8.** The high magnification image of PGA/CDDP@MnO<sub>2</sub> NPs after degradation in GSH medium (10 mM) for 24 h (a: scale bar = 50 nm, b: scale bar = 20 nm).
